# Supplementary material
Source: PubMed Central journal article supplement (PMC5695120)
Supplement: IAI.00195-17_zii012172234s1.pdf [file IAI.00195-17_zii012172234s1.pdf]

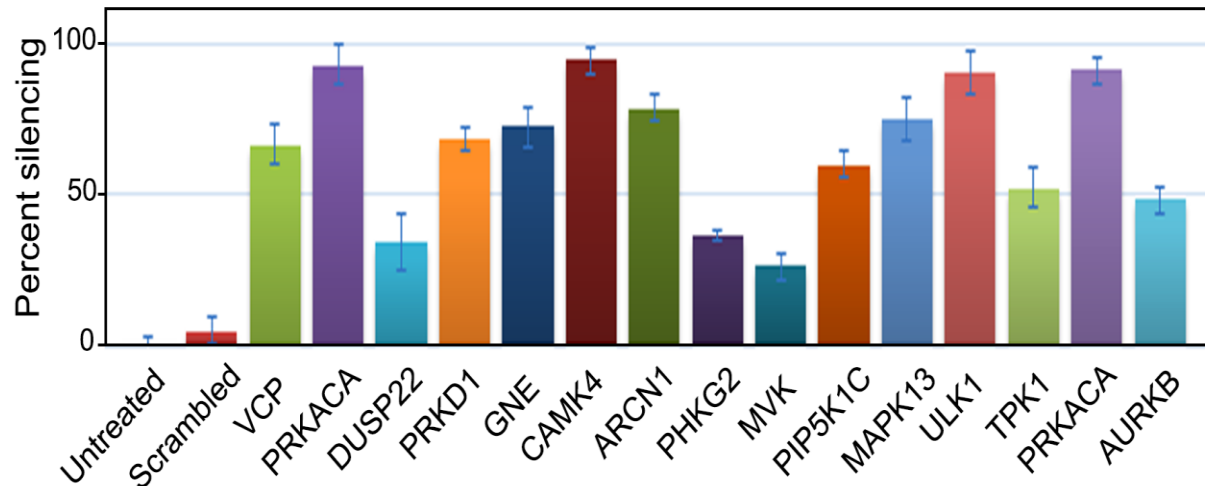

**Supplemental Figure 1. siRNA silencing efficiency.** THP-1 cells were differentiated and treated with no siRNA, control scrambled siRNA, or siRNA targeting the indicated proteins as described in the Materials and Methods section. At 48 h after transfection RNA was extracted and converted to cDNA and RT-PCR was performed to assess silencing efficiency for a randomly selected group of targets. Overall silencing ranged from 27% to 95%, with a mean of 66% and SEM of 5.8%. Data shown (mean ± SEM) are compiled from 3 technical and 2 biological replicates.

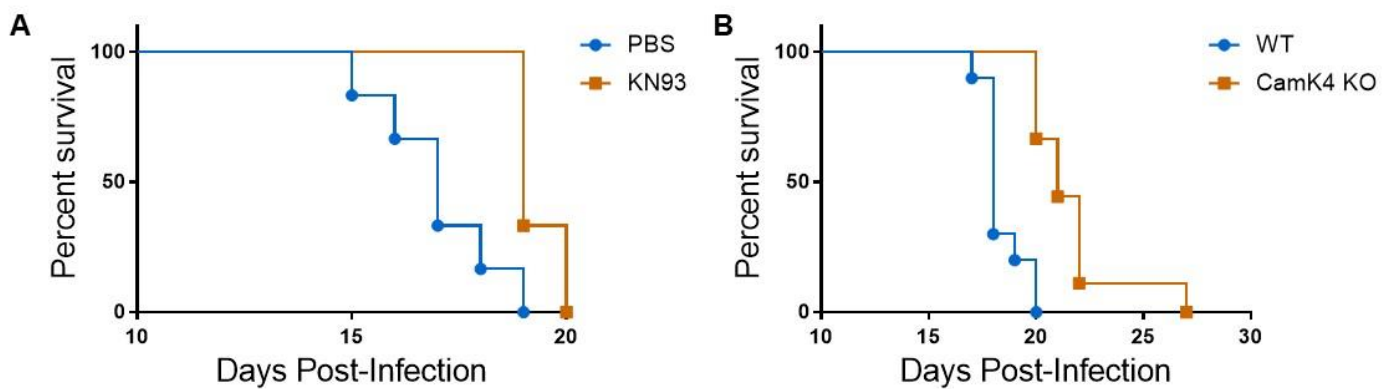

**Supplemental Figure 2. Additional mouse survival studies.** A. Survival of C57BL/6 mice treated with either PBS alone (blue) or with 250  $\mu\text{g/g}$  body weight KN93 in PBS (orange). Mice were treated one day prior to infection with  $5 \times 10^4$  cryptococci and three times a week post-infection. Results are from one experiment with 6 mice per group;  $p < 0.05$  by LogRank test. D. Wild type (WT;  $n=10$ ) and CaMK4 knockout mice ( $n=9$ ) were infected with *C. neoformans* and monitored as detailed in the Methods. Results are from one experiment;  $p < 0.05$  by LogRank test.

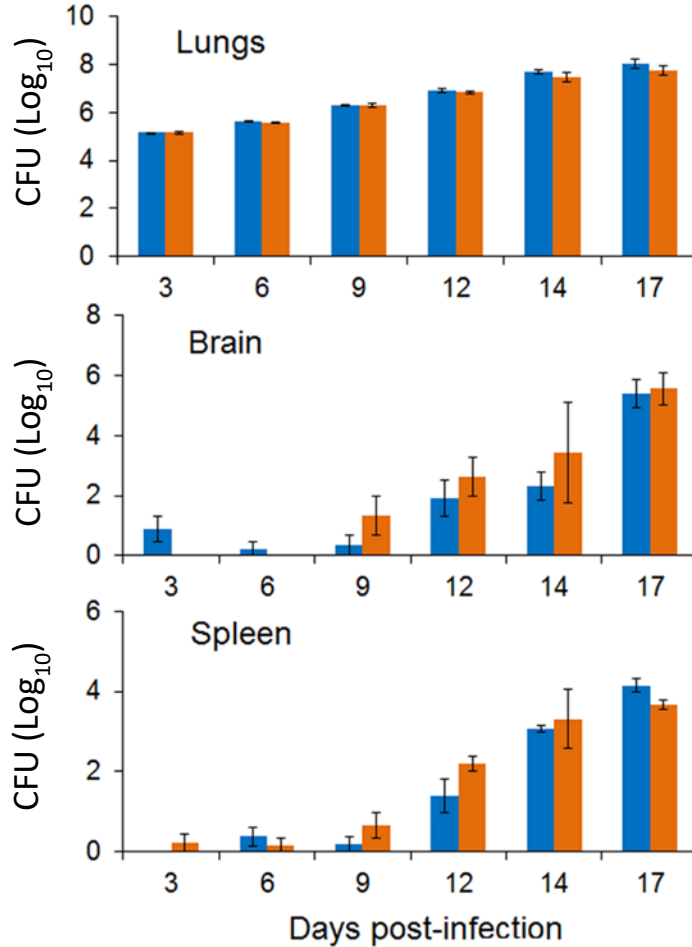

**Supplemental Figure 3. Absence of CamK4 does not influence organ burden of *C. neoformans*.** Lung, brain, and spleen were harvested from WT (blue) and CaMK4<sup>-/-</sup> (orange) mice at the indicated times after intranasal infection with  $5 \times 10^4$  cryptococci, and fungal burden was assessed by colony forming units (CFU). Data are from 2 independent experiments with 6-10 mice per group per time point; means  $\pm$  SEM are plotted.

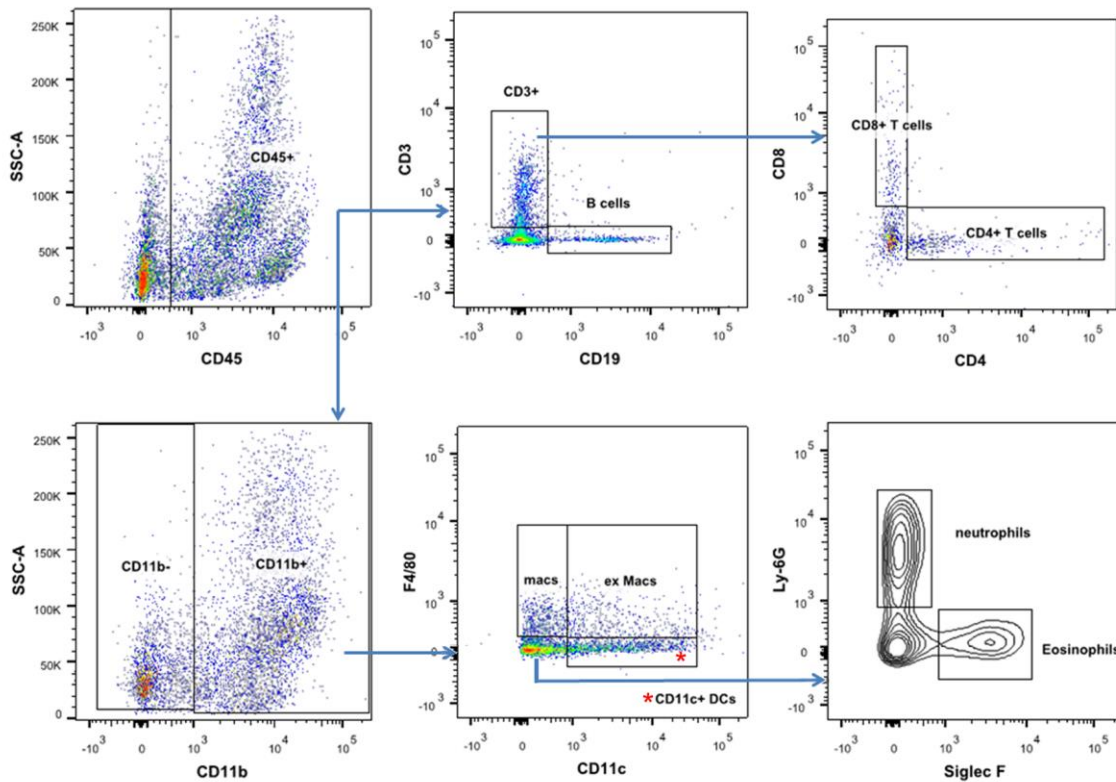

**Supplemental Figure 4. Flow cytometry gating strategy.** Flow cytometry analysis of host leukocyte populations in WT mice 7 days after intranasal infection with  $10^4$  *C. neoformans*. After separation based on physical properties to eliminate debris and aggregated cells, dead cells were excluded by live/dead staining (not shown). CD45+ cells (leukocytes; top left) were subjected to analysis based on their expression of CD3, CD19, CD4, CD8, CD11b, CD11c, F4/80, Ly-6G, and Siglec F. The specific populations of cells identified are indicated on the flow plots.

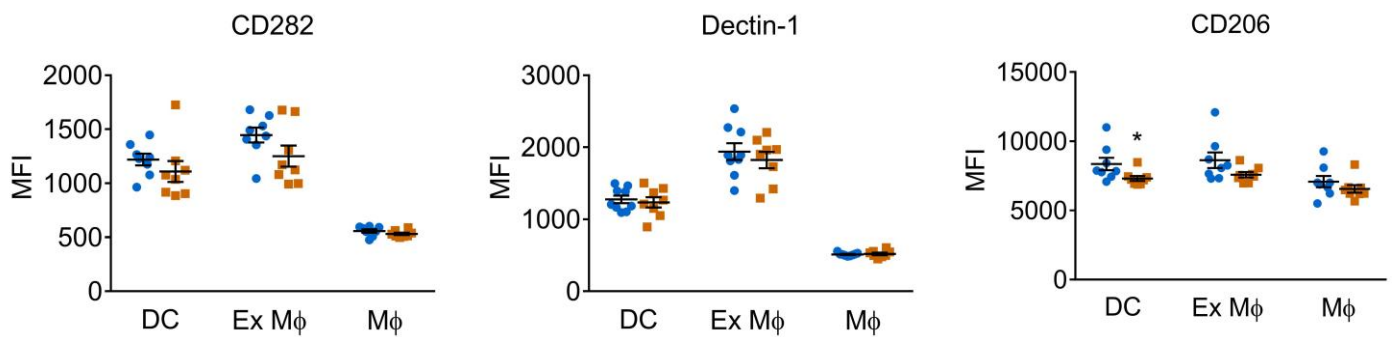

**Supplemental Figure 5. Mean fluorescence intensity of PRRs.** PRR profiling of leukocytes from WT (blue circles) and CaMK4 knockout (orange squares) mice 7 days after infection with  $10^4$  *C. neoformans* KN99 $\alpha$ . Antibody labeling and flow cytometry were used to classify pulmonary leukocytes as DCs (CD45<sup>+</sup>, CD11b<sup>+</sup>, CD11c<sup>+</sup>, F4/80<sup>-</sup>), exudate or recruited macrophages (CD45<sup>+</sup>, CD11b<sup>+</sup>, CD11c<sup>+</sup>, F4/80<sup>+</sup>), or macrophages/monocytes (CD45<sup>+</sup>, CD11b<sup>+</sup>, CD11c<sup>-</sup>, F4/80<sup>+</sup>) and assess PRR expression. Symbols, data from individual mice in 2 independent experiments with 4-5 mice per group; means  $\pm$  SEM are also shown (\*,  $P < 0.05$  by Student's t-test).

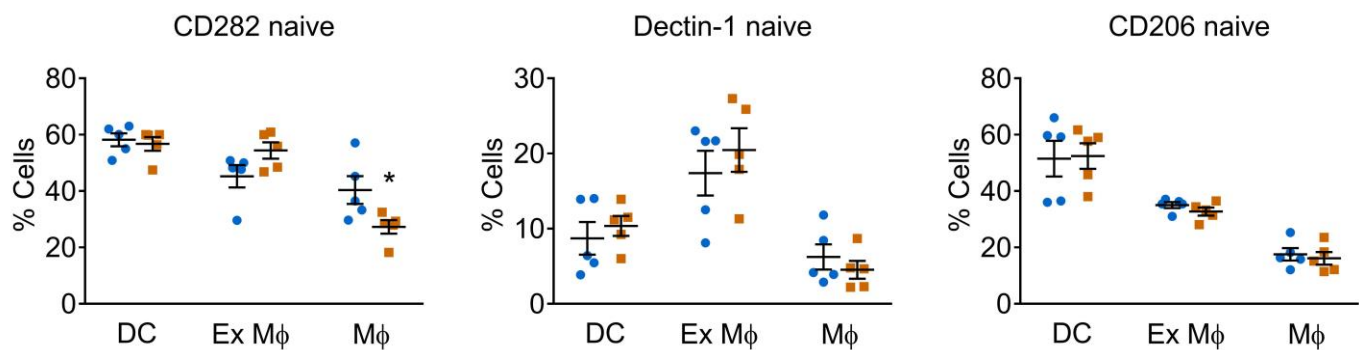

**Supplemental Figure 6. Expression of PRRs in naïve mice.** PRR profiling of leukocytes from naïve WT (blue circles) or CaMK4 knockout (orange squares) mice. Antibody labeling and flow cytometry were used to classify pulmonary leukocytes as DCs (CD45<sup>+</sup>, CD11b<sup>+</sup>, CD11c<sup>+</sup>, F4/80<sup>-</sup>), exudate or recruited macrophages (CD45<sup>+</sup>, CD11b<sup>+</sup>, CD11c<sup>+</sup>, F4/80<sup>+</sup>), or macrophages/monocytes (CD45<sup>+</sup>, CD11b<sup>+</sup>, CD11c<sup>-</sup>, F4/80<sup>+</sup>) and assess PRR expression. Data from individual mice (5 mice per group) are shown, with means  $\pm$  SEM (\*,  $P < 0.05$  by Student's t-test).

Supplemental Table 1

| Gene Symbol | Biological Role                                                                            | phagocytic index | stdev | adherence index | stdev |
|-------------|--------------------------------------------------------------------------------------------|------------------|-------|-----------------|-------|
| ACP1        | acid phosphatase 1                                                                         | 1.12             | 0.24  | 1.04            | 0.19  |
| ADCK5       | aarF domain containing kinase 5                                                            | 1.26             | 0.17  | 0.89            | 0.20  |
| AURKB       | aurora kinase B                                                                            | 1.05             | 0.25  | 0.85            | 0.27  |
| BCKDK       | branched chain ketoacid dehydrogenase kinase                                               | 0.98             | 0.17  | 1.05            | 0.14  |
| CAMK4       | calcium/calmodulin-dependent protein kinase IV                                             | 0.82             | 0.12  | 0.89            | 0.28  |
| CAMKK2      | calcium/calmodulin-dependent protein kinase kinase 2, beta                                 | 1.08             | 0.72  | 1.08            | 1.00  |
| CDKL5       | cyclin-dependent kinase-like 5                                                             | 0.86             | 0.21  | 1.07            | 0.28  |
| CDKN1A      | cyclin-dependent kinase inhibitor 1A (p21, Cip1)                                           | 0.69             | 0.30  | 1.09            | 0.31  |
| CDKN3       | cyclin-dependent kinase inhibitor 3                                                        | 1.08             | 0.09  | 1.09            | 0.11  |
| CKMT1B      | creatine kinase, mitochondrial 1B                                                          | 1.13             | 0.19  | 1.22            | 0.23  |
| CNKSR1      | connector enhancer of kinase suppressor of Ras 1                                           | 1.05             | 0.35  | 1.13            | 0.53  |
| CNKSR3      | CNKSR family member 3                                                                      | 1.17             | 0.22  | 1.06            | 0.33  |
| CSNK1A1     | casein kinase 1, alpha 1                                                                   | 1.11             | 0.01  | 0.86            | 0.04  |
| CTDSP1      | CTD (carboxy-terminal domain, RNA polymerase II, polypeptide A) small phosphatase-like     | 0.91             | 0.17  | 1.08            | 0.25  |
| DGKZ        | diacylglycerol kinase, zeta 104kDa                                                         | 1.17             | 0.26  | 0.80            | 0.25  |
| DLGAP5      | discs, large (Drosophila) homolog-associated protein 5                                     | 0.82             | 0.30  | 0.98            | 0.40  |
| DUS2L       | dihydrouridine synthase 2                                                                  | 0.69             | 0.14  | 0.94            | 0.17  |
| DUSP22      | dual specificity phosphatase 22                                                            | 0.98             | 0.21  | 0.88            | 0.22  |
| EPHA5       | EPH receptor A5                                                                            | 2.04             | 0.22  | 0.99            | 0.24  |
| FLT3        | fms-related tyrosine kinase 3                                                              | 1.36             | 0.26  | 1.22            | 0.22  |
| FYN         | FYN proto-oncogene, Src family tyrosine kinase                                             | 1.30             | 0.15  | 1.11            | 0.09  |
| GNE         | glucosamine (UDP-N-acetyl)-2-epimerase/N-acetylmannosamine kinase                          | 0.79             | 0.09  | 0.85            | 0.18  |
| GRK7        | G protein-coupled receptor kinase 7                                                        | 1.71             | 0.18  | 1.08            | 0.17  |
| GUCY2D      | guanylate cyclase 2D, membrane (retina-specific)                                           | 1.30             | 0.28  | 0.98            | 0.24  |
| IP6K2       | inositol hexakisphosphate kinase 2                                                         | 1.67             | 0.07  | 1.40            | 0.11  |
| IP6K3       | inositol hexakisphosphate kinase 3                                                         | 1.45             | 0.17  | 1.06            | 0.23  |
| KDR         | kinase insert domain receptor (a type III receptor tyrosine kinase)                        | 1.69             | 0.20  | 0.89            | 0.15  |
| KSR2        | kinase suppressor of ras 2                                                                 | 0.99             | 0.13  | 0.93            | 0.12  |
| LTK         | leukocyte receptor tyrosine kinase                                                         | 0.74             | 0.17  | 1.17            | 0.10  |
| MAP4K2      | mitogen-activated protein kinase kinase kinase kinase 2                                    | 1.69             | 0.13  | 0.67            | 0.15  |
| MAP4K4      | mitogen-activated protein kinase kinase kinase 4                                           | 1.24             | 0.15  | 1.27            | 0.25  |
| MAPK13      | mitogen-activated protein kinase 13                                                        | 1.45             | 0.18  | 0.61            | 0.24  |
| MAPK8IP3    | mitogen-activated protein kinase 8 interacting protein 3                                   | 0.97             | 0.04  | 1.18            | 0.06  |
| MAPKAPK3    | mitogen-activated protein kinase-activated protein kinase 3                                | 1.13             | 0.08  | 1.20            | 0.02  |
| MVK         | mevalonate kinase                                                                          | 1.13             | 0.14  | 1.21            | 0.18  |
| MYLK        | myosin light chain kinase                                                                  | 1.56             | 0.05  | 1.11            | 0.16  |
| NEK2        | NIMA (never in mitosis gene a)-related kinase 2                                            | 1.05             | 0.13  | 0.87            | 0.13  |
| NLK         | nemo-like kinase                                                                           | 0.64             | 0.16  | 0.92            | 0.13  |
| NME7        | non-metastatic cells 7, protein expressed in (nucleoside-diphosphate kinase)               | 1.91             | 0.24  | 1.09            | 0.28  |
| PAK2        | p21 protein (Cdc42/Rac)-activated kinase 2                                                 | 1.08             | 0.26  | 1.11            | 0.32  |
| PAK4        | p21 protein (Cdc42/Rac)-activated kinase 4                                                 | 0.95             | 0.12  | 0.94            | 0.13  |
| PDGFRB      | platelet-derived growth factor receptor, beta polypeptide                                  | 1.26             | 0.23  | 1.00            | 0.25  |
| PDXK        | pyridoxal (pyridoxine, vitamin B6) kinase                                                  | 1.44             | 0.18  | 1.11            | 0.27  |
| PFKP        | phosphofructokinase, platelet                                                              | 1.05             | 0.15  | 1.14            | 0.27  |
| PHKG2       | phosphorylase kinase, gamma 2 (testis)                                                     | 1.07             | 0.23  | 0.83            | 0.22  |
| PICK1       | protein interacting with PRKCA 1                                                           | 0.76             | 0.13  | 1.13            | 0.26  |
| PIM1        | pim-1 oncogene                                                                             | 0.91             | 0.10  | 0.81            | 0.12  |
| PIP4K2C     | phosphatidylinositol-5-phosphate 4-kinase, type II, gamma                                  | 1.26             | 0.13  | 0.98            | 0.14  |
| PIP5K1L     | phosphatidylinositol-4-phosphate 5-kinase-like 1                                           | 1.12             | 0.09  | 1.02            | 0.08  |
| PPP1CB      | protein phosphatase 1, catalytic subunit, beta isozyme                                     | 1.11             | 0.14  | 0.94            | 0.17  |
| PPP1R10     | protein phosphatase 1, regulatory subunit 10                                               | 1.25             | 0.03  | 1.41            | 0.07  |
| PPP2CB      | protein phosphatase 2, catalytic subunit, beta isozyme                                     | 0.70             | 0.16  | 1.26            | 0.14  |
| PRKACA      | protein kinase, cAMP-dependent, catalytic, alpha                                           | 1.24             | 0.17  | 0.86            | 0.13  |
| PRKAR1A     | protein kinase, cAMP-dependent, regulatory, type I, alpha (tissue specific extinguisher 1) | 0.77             | 0.14  | 1.07            | 0.21  |
| PRKCD       | protein kinase C, delta                                                                    | 1.33             | 0.17  | 1.12            | 0.26  |
| PRKD1       | protein kinase D1                                                                          | 1.63             | 0.26  | 1.23            | 0.19  |
| PRKG1       | protein kinase, cGMP-dependent, type I                                                     | 1.01             | 0.29  | 1.05            | 0.29  |
| PRSS7       | protease, serine, 7 (enterokinase)                                                         | 0.97             | 0.23  | 1.16            | 0.21  |
| PTPN20B     | protein tyrosine phosphatase, non-receptor type 20                                         | 0.88             | 0.17  | 0.61            | 0.14  |
| PTPN4       | protein tyrosine phosphatase, non-receptor type 4                                          | 1.29             | 0.21  | 0.65            | 0.20  |
| PTPRH       | protein tyrosine phosphatase, receptor type, H                                             | 1.07             | 0.15  | 0.91            | 0.19  |
| RNGTT       | RNA guanylyltransferase and 5'-phosphatase                                                 | 1.13             | 0.05  | 1.25            | 0.13  |
| RPS6KA2     | ribosomal protein S6 kinase, 90kDa, polypeptide 2                                          | 1.19             | 0.20  | 0.85            | 0.21  |
| SBF1        | SET binding factor 1                                                                       | 1.04             | 0.18  | 1.04            | 0.27  |
| SCYL3       | SCY1-like 3 (S. cerevisiae)                                                                | 0.72             | 0.39  | 1.06            | 0.48  |
| SH3KBP1     | SH3-domain kinase binding protein 1                                                        | 1.27             | 0.14  | 1.11            | 0.18  |
| SPRYD3      | SPRY domain containing 3                                                                   | 1.32             | 0.22  | 0.87            | 0.32  |
| STK36       | serine/threonine kinase 36, fused homolog (Drosophila)                                     | 1.04             | 0.18  | 0.94            | 0.25  |
| STYXL1      | serine/threonine/tyrosine interacting-like 1                                               | 1.19             | 0.29  | 1.07            | 0.33  |
| TK1         | thymidine kinase 1, soluble                                                                | 1.27             | 0.26  | 1.01            | 0.33  |
| TPD52L3     | tumor protein D52-like 3                                                                   | 1.33             | 0.37  | 1.13            | 0.43  |
| TPK1        | thiamin pyrophosphokinase 1                                                                | 1.14             | 0.22  | 0.92            | 0.25  |
| TRIM24      | tripartite motif-containing 24                                                             | 0.99             | 0.25  | 1.10            | 0.32  |
| TRIM33      | tripartite motif-containing 33                                                             | 1.06             | 0.17  | 0.93            | 0.15  |
| TRRAP       | transformation/transcription domain-associated protein                                     | 1.17             | 0.29  | 1.05            | 0.34  |
| ULK1        | unc-51-like kinase 1 (C. elegans)                                                          | 0.79             | 0.12  | 1.17            | 0.09  |
| ULK2        | unc-51-like kinase 2 (C. elegans)                                                          | 0.88             | 0.13  | 0.73            | 0.11  |
| ZAP70       | zeta-chain (TCR) associated protein kinase 70kDa                                           | 0.89             | 0.31  | 1.14            | 0.31  |
| ZMYND8      | zinc finger, MYND-type containing 8                                                        | 1.50             | 0.26  | 0.81            | 0.21  |

| Supplemental Table 2 |        |                |                |                |                |             |           |                |                |                |                |             |  |
|----------------------|--------|----------------|----------------|----------------|----------------|-------------|-----------|----------------|----------------|----------------|----------------|-------------|--|
| Gene Name            |        | <i>C. neo.</i> | <i>C. alb.</i> | <i>S. cer.</i> | <i>E. coli</i> | Latex beads |           | <i>C. neo.</i> | <i>C. alb.</i> | <i>S. cer.</i> | <i>E. coli</i> | Latex beads |  |
| ADCK5                | uptake | 1.06           | 1.16           | 1.06           | 1.02           | 0.97        | adherence | 1.07           | 1.28           | 0.96           | 1.00           | 0.97        |  |
|                      | stdev  | 0.08           | 0.12           | 0.11           | 0.04           | 0.09        | stdev     | 0.15           | 0.22           | 0.06           | 0.12           | 0.19        |  |
| AURKB                | uptake | 0.99           | 0.99           | 1.03           | 0.98           | 1.31        | adherence | 1.00           | 1.00           | 1.04           | 0.80           | 1.35        |  |
|                      | stdev  | 0.20           | 0.17           | 0.19           | 0.32           | 1.33        | stdev     | 0.24           | 0.21           | 0.37           | 0.40           | 1.31        |  |
| CAMK4                | uptake | 0.67           | 0.97           | 1.02           | 0.98           | 0.96        | adh       | 0.95           | 1.02           | 1.01           | 0.92           | 0.93        |  |
|                      | stdev  | 0.16           | 0.13           | 0.08           | 0.07           | 0.04        | stdev     | 0.16           | 0.17           | 0.11           | 0.11           | 0.15        |  |
| CAMKK2               | uptake | 0.96           | 1.02           | 1.03           | 0.97           | 1.80        | adherence | 1.03           | 1.11           | 1.07           | 1.12           | 1.88        |  |
|                      | stdev  | 0.12           | 0.16           | 0.18           | 0.33           | 1.13        | stdev     | 0.17           | 0.20           | 0.25           | 0.51           | 1.20        |  |
| CCL15                | uptake | 0.91           | 0.89           | 0.85           | 0.85           | 0.58        | adherence | 0.93           | 0.84           | 0.80           | 0.78           | 0.70        |  |
|                      | stdev  | 0.25           | 0.16           | 0.15           | 0.36           | 0.12        | stdev     | 0.29           | 0.17           | 0.15           | 0.26           | 0.16        |  |
| CTDSPL               | uptake | 1.00           | 1.08           | 1.05           | 0.97           | 0.97        | adherence | 0.98           | 1.13           | 0.97           | 1.06           | 1.06        |  |
|                      | stdev  | 0.12           | 0.13           | 0.08           | 0.08           | 0.05        | stdev     | 0.17           | 0.19           | 0.10           | 0.15           | 0.15        |  |
| DLGAP5               | uptake | 1.01           | 1.03           | 1.01           | 0.99           | 1.00        | adherence | 0.98           | 1.09           | 0.98           | 0.92           | 1.06        |  |
|                      | stdev  | 0.10           | 0.10           | 0.05           | 0.05           | 0.07        | stdev     | 0.16           | 0.18           | 0.11           | 0.10           | 0.15        |  |
| DUSP22               | uptake | 0.78           | 1.05           | 1.08           | 0.97           | 1.00        | adherence | 1.00           | 1.12           | 1.06           | 0.91           | 1.08        |  |
|                      | stdev  | 0.12           | 0.13           | 0.08           | 0.06           | 0.06        | stdev     | 0.15           | 0.18           | 0.12           | 0.14           | 0.17        |  |
| GNE                  | uptake | 0.65           | 0.98           | 1.08           | 0.97           | 0.97        | adherence | 0.98           | 1.10           | 1.08           | 1.02           | 1.09        |  |
|                      | stdev  | 0.17           | 0.14           | 0.08           | 0.07           | 0.04        | stdev     | 0.18           | 0.27           | 0.11           | 0.16           | 0.13        |  |
| LRRK2                | uptake | 0.93           | 1.01           | 0.94           | 0.89           | 0.79        | adherence | 1.09           | 1.14           | 0.97           | 0.82           | 0.80        |  |
|                      | stdev  | 0.17           | 0.17           | 0.12           | 0.29           | 0.16        | stdev     | 0.23           | 0.20           | 0.07           | 0.42           | 0.22        |  |
| MAP4K2               | uptake | 0.81           | 0.89           | 0.84           | 0.78           | 0.67        | adherence | 0.90           | 0.96           | 0.92           | 0.85           | 0.75        |  |
|                      | stdev  | 0.21           | 0.20           | 0.11           | 0.33           | 0.34        | stdev     | 0.18           | 0.20           | 0.12           | 0.38           | 0.31        |  |
| MAPK13               | uptake | 0.92           | 0.98           | 0.92           | 0.89           | 1.02        | adherence | 1.02           | 1.04           | 0.96           | 0.91           | 1.05        |  |
|                      | stdev  | 0.13           | 0.16           | 0.14           | 0.39           | 0.82        | stdev     | 0.15           | 0.19           | 0.13           | 0.56           | 0.87        |  |
| MVK                  | uptake | 0.96           | 1.04           | 1.07           | 0.98           | 0.98        | adherence | 1.03           | 1.14           | 1.00           | 1.01           | 0.95        |  |
|                      | stdev  | 0.11           | 0.14           | 0.09           | 0.07           | 0.06        | stdev     | 0.14           | 0.17           | 0.11           | 0.12           | 0.15        |  |
| PHKG2                | uptake | 1.02           | 1.08           | 1.10           | 1.03           | 0.98        | adherence | 1.06           | 1.11           | 1.03           | 1.04           | 1.01        |  |
|                      | stdev  | 0.06           | 0.11           | 0.10           | 0.11           | 0.07        | stdev     | 0.13           | 0.13           | 0.11           | 0.18           | 0.18        |  |
| PIP5K1C              | uptake | 1.00           | 1.01           | 1.01           | 0.95           | 0.98        | adherence | 0.96           | 1.03           | 1.02           | 0.93           | 0.93        |  |
|                      | stdev  | 0.09           | 0.12           | 0.05           | 0.08           | 0.06        | stdev     | 0.12           | 0.16           | 0.11           | 0.13           | 0.19        |  |
| PPP1R10              | uptake | 0.92           | 0.94           | 0.92           | 0.97           | 0.75        | adherence | 0.96           | 0.94           | 0.84           | 0.80           | 0.76        |  |
|                      | stdev  | 0.17           | 0.15           | 0.12           | 0.38           | 0.19        | stdev     | 0.29           | 0.18           | 0.12           | 0.28           | 0.19        |  |
| PRKACA               | uptake | 0.97           | 1.02           | 1.04           | 0.99           | 0.95        | adherence | 0.95           | 1.03           | 0.97           | 0.99           | 1.00        |  |
|                      | stdev  | 0.13           | 0.14           | 0.07           | 0.07           | 0.06        | stdev     | 0.11           | 0.16           | 0.12           | 0.14           | 0.20        |  |
| PRKCD                | uptake | 1.29           | 1.44           | 0.94           | 1.22           | 0.70        | adherence | 1.03           | 1.12           | 0.77           | 0.84           | 0.81        |  |
|                      | stdev  | 0.22           | 0.18           | 0.12           | 0.41           | 0.17        | stdev     | 0.33           | 0.17           | 0.16           | 0.64           | 0.20        |  |
| PRKD1                | uptake | 1.00           | 1.00           | 0.89           | 0.93           | 0.64        | adherence | 1.27           | 1.00           | 0.74           | 0.74           | 0.70        |  |
|                      | stdev  | 0.23           | 0.20           | 0.09           | 0.38           | 0.18        | adherence | 0.33           | 0.20           | 0.13           | 0.35           | 0.16        |  |
| PTPN20B              | uptake | 0.92           | 0.97           | 0.87           | 0.83           | 0.66        | adherence | 0.84           | 0.91           | 0.81           | 0.81           | 0.62        |  |
|                      | stdev  | 0.14           | 0.19           | 0.10           | 0.36           | 0.25        | stdev     | 0.18           | 0.15           | 0.09           | 0.37           | 0.20        |  |
| RPS6KA2              | uptake | 0.93           | 0.99           | 1.03           | 0.98           | 0.96        | adherence | 0.96           | 1.02           | 1.02           | 1.01           | 1.05        |  |
|                      | stdev  | 0.12           | 0.15           | 0.08           | 0.07           | 0.06        | stdev     | 0.15           | 0.18           | 0.14           | 0.13           | 0.23        |  |
| SCYL3                | uptake | 0.97           | 1.07           | 1.05           | 1.00           | 0.96        | adherence | 0.97           | 1.17           | 1.00           | 1.00           | 0.98        |  |
|                      | stdev  | 0.10           | 0.16           | 0.09           | 0.06           | 0.06        | stdev     | 0.10           | 0.23           | 0.07           | 0.16           | 0.10        |  |
| SPRYD3               | uptake | 0.99           | 0.94           | 0.93           | 0.91           | 0.55        | adherence | 1.07           | 1.00           | 0.95           | 1.07           | 0.65        |  |
|                      | stdev  | 0.17           | 0.25           | 0.17           | 0.35           | 0.14        | stdev     | 0.26           | 0.17           | 0.13           | 0.47           | 0.18        |  |
| TPK1                 | uptake | 0.90           | 0.90           | 0.97           | 0.92           | 0.92        | adherence | 0.90           | 0.91           | 1.00           | 0.95           | 1.06        |  |
|                      | stdev  | 0.15           | 0.21           | 0.10           | 0.36           | 0.70        | stdev     | 0.17           | 0.23           | 0.08           | 0.50           | 0.75        |  |
| ULK1                 | uptake | 0.84           | 0.88           | 0.83           | 0.75           | 0.66        | adherence | 0.92           | 0.95           | 0.83           | 0.66           | 0.64        |  |
|                      | stdev  | 0.24           | 0.23           | 0.15           | 0.29           | 0.22        | stdev     | 0.29           | 0.25           | 0.19           | 0.46           | 0.24        |  |



**Supplemental Table 3**

| <b>Antigen</b>  | <b>Clone</b> | <b>Fluorophore</b> | <b>Company</b> |
|-----------------|--------------|--------------------|----------------|
| CD3             | 17-A2        | APC-Cy7            | BioLegend      |
| CD4             | GK1.5        | BUV737             | BD Biosciences |
| CD8a            | 53-6.7       | BV650              | BD Biosciences |
| CD11b           | M1/70        | BV510              | BD Biosciences |
| CD11c           |              | PE                 | Affymetrix     |
| CD19            | 1D3          | BV786              | BD Biosciences |
| CD45            | 30-F11       | Pacific Blue       | BioLegend      |
| F4/80           | BM8          | APC                | Thermo         |
| F4/80           | BM8          | PE-Cy7             | Affymetrix     |
| Ly-6G           | 1A8          | BV711              | BD Biosciences |
| Siglec-F        | E50-2440     | PE-CF594           | BD Biosciences |
|                 |              |                    |                |
| CD14            | rmC5-3       | Alexa Fluor 647    | BD Biosciences |
| CD16/CD32       | 2.4G2        | APC                | BD Biosciences |
| CD18            | C71/16       | APC                | BD Biosciences |
| CD21/CD35       | 7G6          | APC                | BD Biosciences |
| CD36            | CRF D-2712   | APC                | BD Biosciences |
| CD206           | MR5D3        | Alexa Fluor 647    | BD Biosciences |
| CD282           | 6C2          | Alexa Fluor 647    | BD Biosciences |
| Clec6A/Dectin-2 | Polyclonal   | APC                | R&D            |
| Clec7A/Dectin-1 | 218820       | APC                | R&D            |
| DNGR1           | 10B4         | Alexa Fluor 647    | BD Biosciences |
